# Supplementary material
Source: PubMed Central journal article supplement (PMC9082339)
Supplement: NIHMS1803006-supplement-Supplemental_Information.pdf [file NIHMS1803006-supplement-Supplemental_Information.pdf]

1 **Supplementary Information for “Stable, diverse, fecal-derived *in vitro* microbial**  
2 **communities that model the intestinal microbiota response to antibiotics”**

3

4 **Authors:** Andrés Aranda-Díaz<sup>1</sup>, Katharine Michelle Ng<sup>1</sup>, Tani Thomsen<sup>1</sup>, Imperio Real-  
5 Ramírez<sup>1</sup>, Dylan Dahan<sup>2</sup>, Susannah Dittmar<sup>1</sup>, Carlos Gutierrez Gonzalez<sup>3</sup>, Taylor  
6 Chavez<sup>1</sup>, Kimberly S. Vasquez<sup>2</sup>, Taylor H. Nguyen<sup>1</sup>, Feiqiao Brian Yu<sup>4</sup>, Steven K.  
7 Higginbottom<sup>2</sup>, Norma F. Neff<sup>4</sup>, Joshua E. Elias<sup>4</sup>, Justin L. Sonnenburg<sup>2,4</sup>, Kerwyn Casey  
8 Huang<sup>2,4\*</sup>

9

10 <sup>1</sup>Department of Bioengineering, Stanford University, Stanford, CA 94305

11 <sup>2</sup>Department of Microbiology and Immunology, Stanford University School of  
12 Medicine, Stanford, CA 94305

13 <sup>3</sup>Department of Chemical and Systems Biology, Stanford University School of Medicine,  
14 Stanford, CA 94305

15 <sup>4</sup>Chan Zuckerberg Biohub, San Francisco, CA 94158

16

17 \*Correspondence: [kchuang@stanford.edu](mailto:kchuang@stanford.edu)

18 **Supplementary Tables**

19

| <b>Strain</b> | <b>Closest relative in NCBI 16S ribosomal RNA sequence database</b> | <b>Ciprofloxacin MIC (<math>\mu\text{g/mL}</math>)</b> |
|---------------|---------------------------------------------------------------------|--------------------------------------------------------|
| TT1           | <i>Enterococcus hirae</i> ATCC 9790                                 | 2                                                      |
| TT2           | <i>Escherichia fergusonii</i> ATCC 35469                            | <0.5                                                   |
| TT3           | [ <i>Clostridium</i> ] <i>symbiosum</i> ATCC 14940                  | 16                                                     |
| TT4           | <i>Bacteroides thetaiotaomicron</i> JCM 5827                        | 16                                                     |
| TT5           | [ <i>Clostridium</i> ] <i>clostridioforme</i> ATCC 25537            | 32                                                     |
| TT6           | <i>Blautia producta</i> JCM 1471                                    | 32                                                     |
| TT7           | [ <i>Clostridium</i> ] <i>scindens</i> strain DSM 5676              | 32                                                     |
| TT8           | <i>Enterococcus faecium</i> strain DSM 20477                        | 4                                                      |
| TT9           | [ <i>Clostridium</i> ] <i>hylemonae</i> TN-272                      | 32                                                     |
| TT10          | <i>Enterococcus faecalis</i> NBRC 100480                            | 4                                                      |
| TT11          | [ <i>Clostridium</i> ] <i>hathewayi</i> 1313                        | 32                                                     |
| TT12          | <i>Bacteroides fragilis</i> NCTC 9343                               | 4                                                      |
| TT13          | <i>Flavonifractor plautii</i> 265                                   | 8                                                      |
| TT14          | <i>Bacteroides uniformis</i> JCM 5828                               | 16                                                     |
| TT15          | <i>Parabacteroides distasonis</i> ATCC 8503                         | 4                                                      |

20 **Table S1: Strains isolated in this study, related to Figure 5.**

| Medium | Formulation                                                                                  | Sterilization        | Storage               |
|--------|----------------------------------------------------------------------------------------------|----------------------|-----------------------|
| BHI    | Commercially available (BD 211061)                                                           | Autoclave 20 min     | Room temperature (RT) |
| TYG    | As described in (Whitaker et al., 2017)                                                      | 0.22- $\mu$ m filter | 4 °C                  |
| GAM    | Commercially available (HiMedia M1801)                                                       | Autoclave 20 min     | RT                    |
| YCFA   | As described in (Duncan et al., 2002).<br>Vitamins and cysteine added 48 h before experiment | 0.22- $\mu$ m filter | 4 °C                  |

21 **Table S2: Media used in this study, related to Figure 1.**

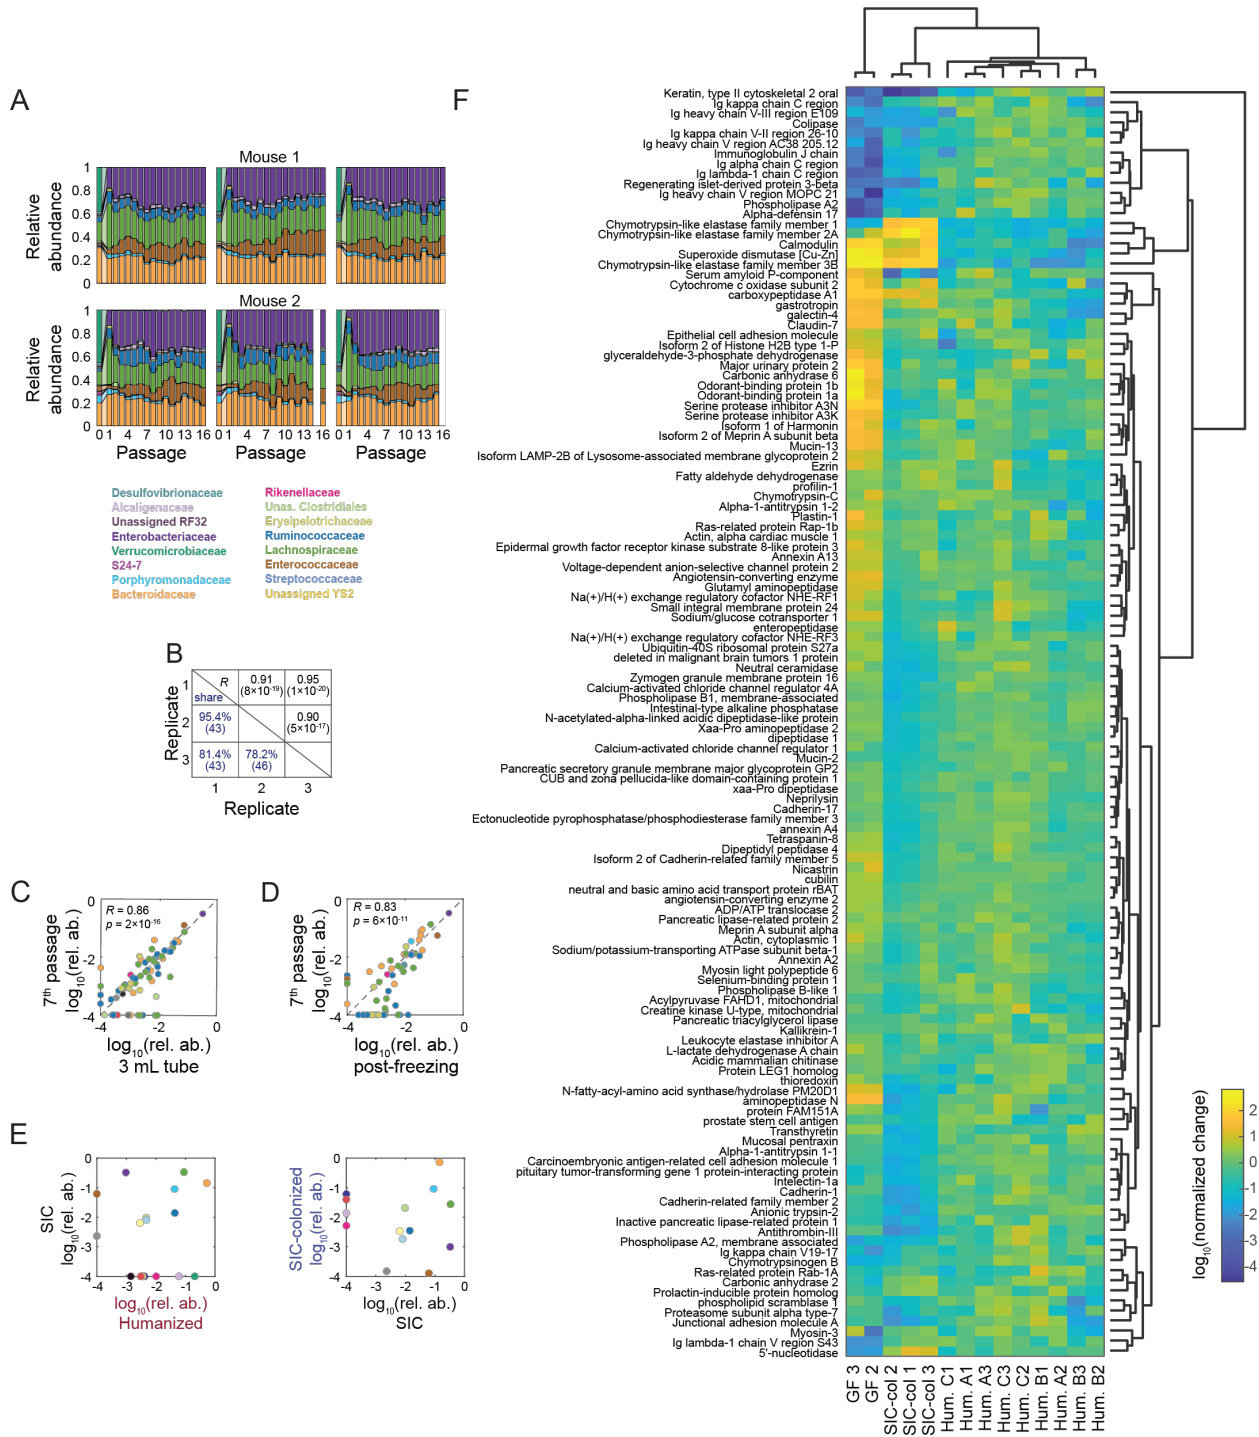

23

24 **Figure S1: Robust, high-throughput cultivation of fecal-derived SICs and**

25 **colonization of a germ-free mice by an SIC. Related to Figures 1 and 2.**

26 A) *In vitro* passaging leads to stable and complex SICs. Family-level composition of  
27 three replicate SICs from two fecal samples (Pre MD mice #1 and #2) during  
28 passaging in BHI for 16 rounds *in vitro*. Passage 0 is the fecal inoculum.

29 B) *In vitro*-passaged SICs are highly reproducible. Summary of the reproducibility of  
30 the three replicates for the mouse 1 SICs in Fig. 1 B-D. *R* and *p* were computed using  
31 only ASVs present in both samples. Also shown is the percentage of ASVs that were  
32 present in both replicates at >0.1% abundance (“shared”), with the total number of  
33 ASVs in parentheses.

34 C,D) SICs can be grown in larger volumes and can be frozen and revived without  
35 affecting composition. ASV-level relative abundance values for the SIC in Fig. 1 B-D  
36 after 7 passages were compared with the same SIC grown for one passage in a larger  
37 vessel without shaking (C), and after freezing with 25% glycerol at -80 °C and  
38 reviving for one passage (D). *R* and *p* were computed using only ASVs present in  
39 both samples. ASVs with relative abundance < 10<sup>-4</sup> were set to 10<sup>-4</sup> for visualization.

40 E) Families that are overrepresented *in vitro* recede *in vivo*. Shown is a comparison of  
41 family-level relative abundance of an SIC and the humanized-mouse fecal inoculum  
42 from which it was derived (left), or ex-germ-free mice colonized with the SIC (right,  
43 SIC *n*=1, inoculum *n*=1, SIC-colonized *n*=3). Families with relative abundance < 10<sup>-4</sup>  
44 were set to 10<sup>-4</sup> for visualization. Mouse data are the same as in Fig. 2B.

45 F) The secreted proteome of mice colonized with SIC is similar to the proteome of  
46 humanized mice. *M. musculus* proteins present at levels 10-fold higher in mice than  
47 in SICs were normalized by their mean abundance in humanized mice.  
48 Dendrograms resulting from hierarchical clustering of normalized relative  
49 abundance of proteins in germ free (GF), SIC-colonized (SIC col.), or humanized  
50 mice (Hum.) housed in three cages (A, B, and C).

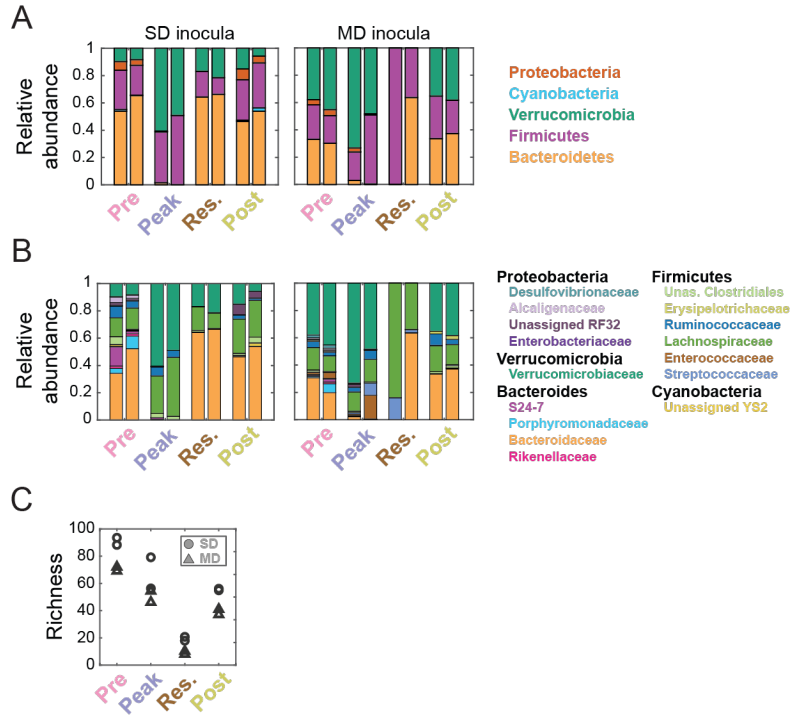

51

52 **Figure S2: Diet and antibiotics have large, distinct, interacting effects on the**

53 **composition of the microbiota, related to Figure 3.**

54 A,B) Ciprofloxacin elicits large changes in microbiota composition at the phylum (A)

55 and family (B) level *in vivo*. Each time point has two bars corresponding to the two

56 mice in each group.

57 C) Diversity *in vivo* decreases during ciprofloxacin treatment and does not fully recover

58 after treatment. Richness (number of ASVs in rarefied data) of fecal inocula.

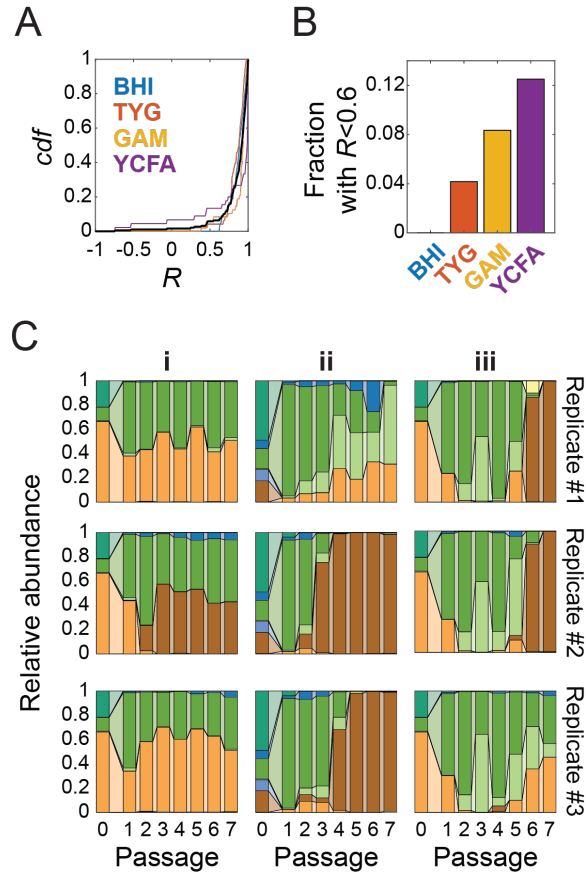

59

60 **Figure S3: SICs are more reproducible in BHI than in other media, related to Figure 3.**

61 A) Technical replicates are largely reproducible. Cumulative density function of  
 62 Pearson correlation coefficient ( $R$ ) for all pairwise comparisons between technical  
 63 replicates.

64 B) Proportion of technical replicate pairwise correlations  $R < 0.6$  for the 4 growth media.

65 C) Non-reproducible technical replicates share similar dynamics during early passages.  
 66 Family-level composition during *in vitro* passaging for 7 rounds of three SICs with  
 67 low correlation coefficients after 7 passages. (i) Technical replicates of SIC  
 68 originating from SD mouse #2 during pre-treatment, grown in GAM. (ii) Technical



69 replicates of SIC originating from MD mouse #2 during peak of treatment, grown in  
70 YCFA. (iii) Technical replicates of SIC originating from SD mouse #2 during residual  
71 treatment, grown in YCFA.

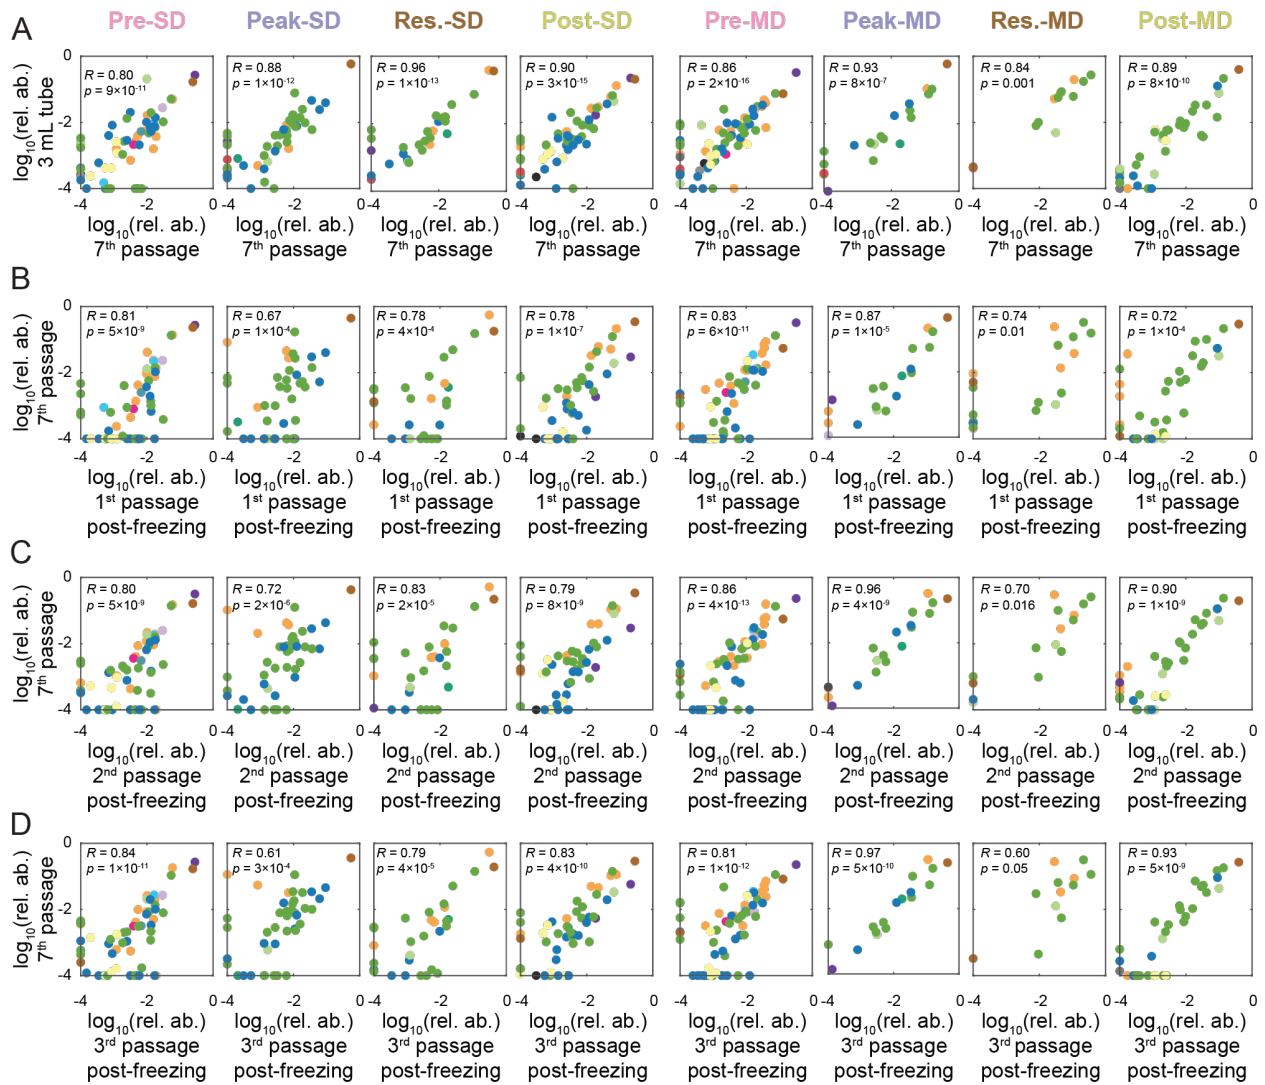

72

73 **Figure S4: SICs maintain composition after growth in larger volumes without**  
 74 **shaking and during revival after freezing, related to Figure 3.**

75 A-D) Correlation plots of  $\log_{10}$ (relative abundance) at the ASV level for 8 SICs grown in  
 76 BHI after 7 passages against the same SIC grown for one passage in a larger volume  
 77 (3 mL) without shaking (A), and after freezing and reviving for one (B), two (C), or  
 78 three (D) passages. Pearson coefficients ( $R$ ) and their  $p$ -values were computed using

79 only data points present in both samples. ASVs with relative abundance  $<10^{-4}$  were  
80 set to  $10^{-4}$  for visualization purposes.

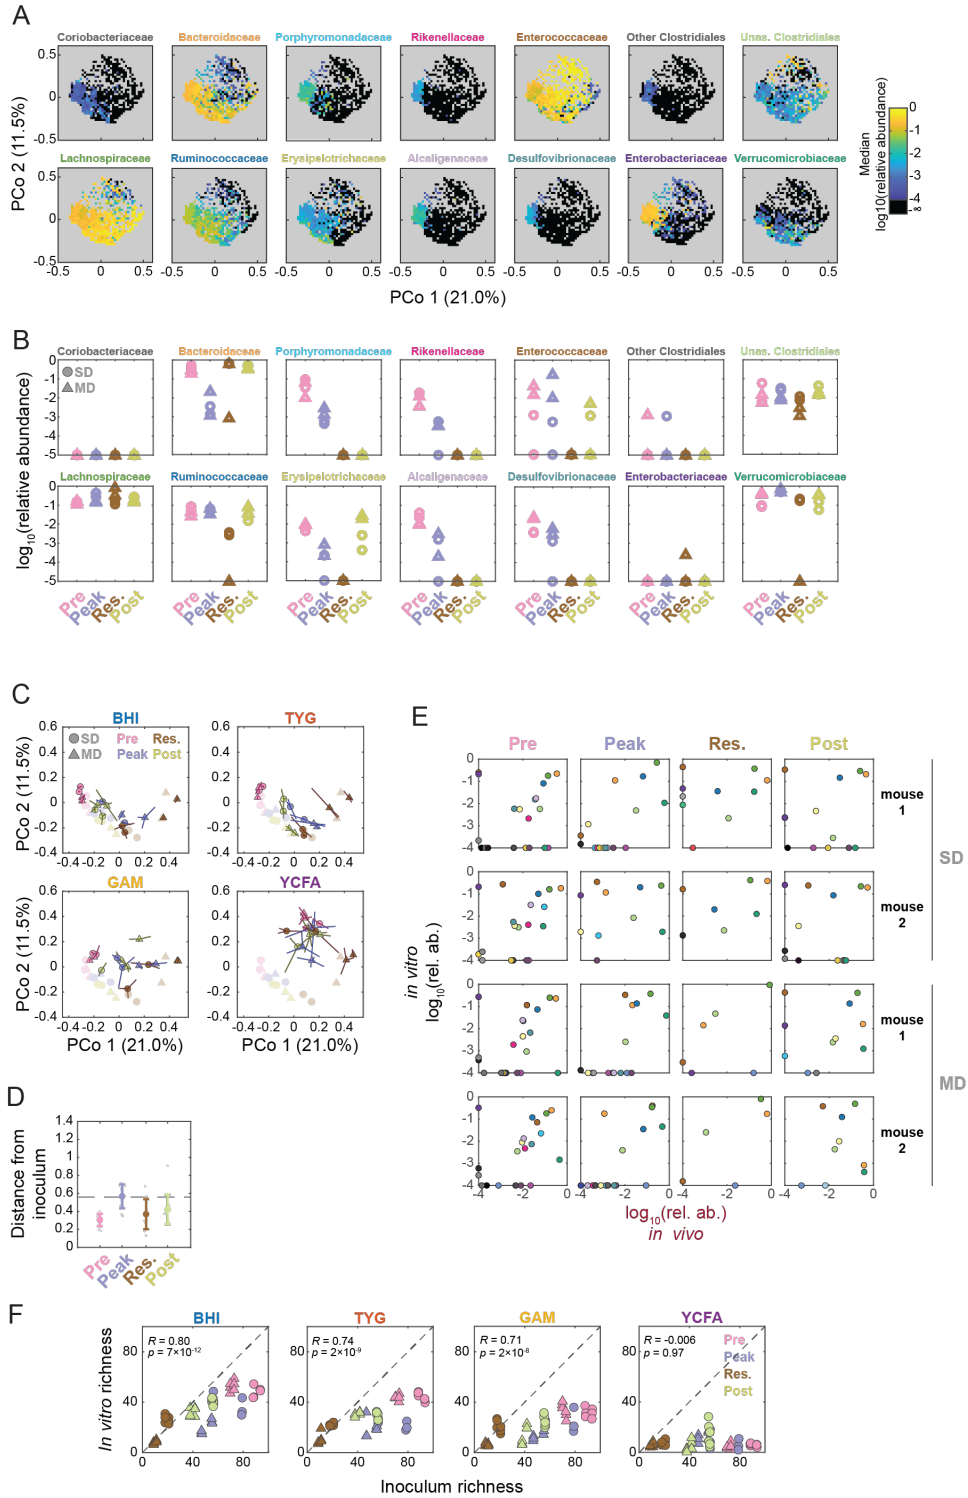

81

82 **Figure S5: Certain families generally co-occur in SICs, related to Figure 3.**

- 83 A) Median  $\log_{10}$ (relative abundance) of families across all samples ( $n=1728$ ) binned by  
84 first two principal components. Only families present in >10% of the samples are  
85 shown.
- 86 B)  $\log_{10}$ (relative abundance) of families in (A) in each of the inocula. Families with  
87 relative abundance  $<10^{-4}$  were set to  $10^{-4}$  for visualization purposes.
- 88 C) Medium and inoculum determine the final composition of passaged SICs. The 7<sup>th</sup>  
89 passage of all 192 SICs in a PCoA of SIC composition using unweighted Unifrac  
90 distance computed on all *in vivo* and *in vitro* samples at the ASV level. Samples are  
91 separated by media, with colors and shapes representing the timepoint during  
92 ciprofloxacin treatment and diet, respectively, in the mice from which the inocula  
93 were taken. Symbols are the centroid of three replicates, with lines connecting the  
94 replicates to the centroid. Original fecal inocula are plotted in light colors. BHI data  
95 is the same as in Fig. 2C.
- 96 D) SICs derived from feces at the peak of treatment *in vivo* are most distinct from the  
97 composition of their inoculum suggesting low viability of detected strains. Weighted  
98 Unifrac distance of the 7<sup>th</sup> passage in BHI of each SIC to their fecal inoculum.  
99 Colored circles, mean distance for each medium; individual SICs in gray. Error bars,  
100 standard deviations;  $n=12$ . Dashed line, mean distance between fecal samples.
- 101 E) *In vitro* passaging in BHI can produce an SIC that retain abundant families in the  
102 fecal inoculum. Mean family-level relative abundances (from mean of passages 4-7)

103 for three SIC triplicates compared with the fecal inoculum from which it originated.  
104 Families with relative abundance  $<10^{-4}$  were set to  $10^{-4}$  for visualization purposes.  
105 F) SIC yield scales with diversity. Mean OD of SICs after 20 h of growth in BHI  
106 passages 3-7 increases with increasing richness (number of ASVs in rarefied data) in  
107 passage 7.  $R$ , Pearson correlation coefficient;  $n=48$ . BHI data is the same as in Fig. 2E.

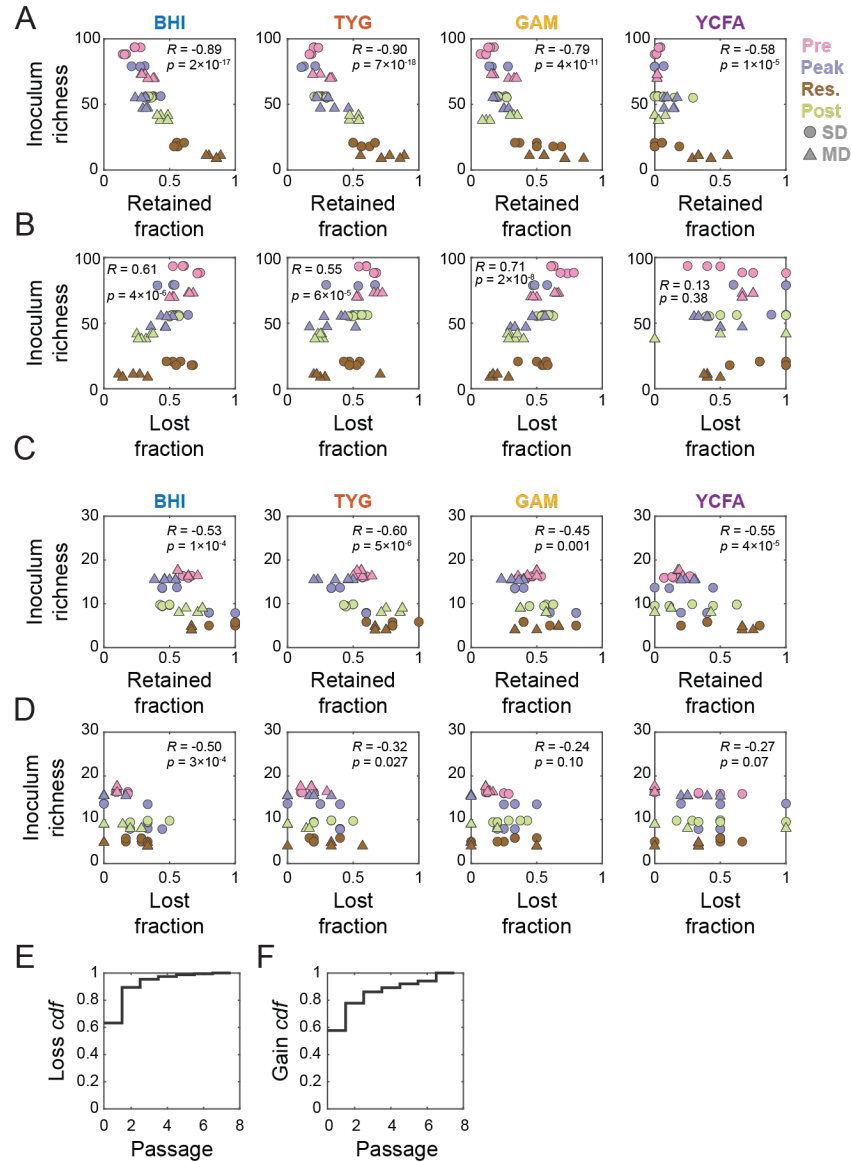

108

109 **Figure S6: Taxa loss and emergence are correlated with inoculum diversity, related to**

110 **Figure 3.**

111 A-D) Correlation plots for inoculum diversity (number of ASVs in (A) and (B), and

112 families in (C) and (D), in rarefied data) with fraction of taxa lost in (A) and (C) and

113 emerged in (B) and (D), for all 192 passaged SICs. Pearson correlation coefficients ( $R$ )

114 and their  $p$ -values were computed from all data points in each plot ( $n=48$ ).

115 E,F) Most ASV loss or emergence occurred within the first three passages. Cumulative  
116 density function for the passage at which an ASV was lost (E) or emerged (F).



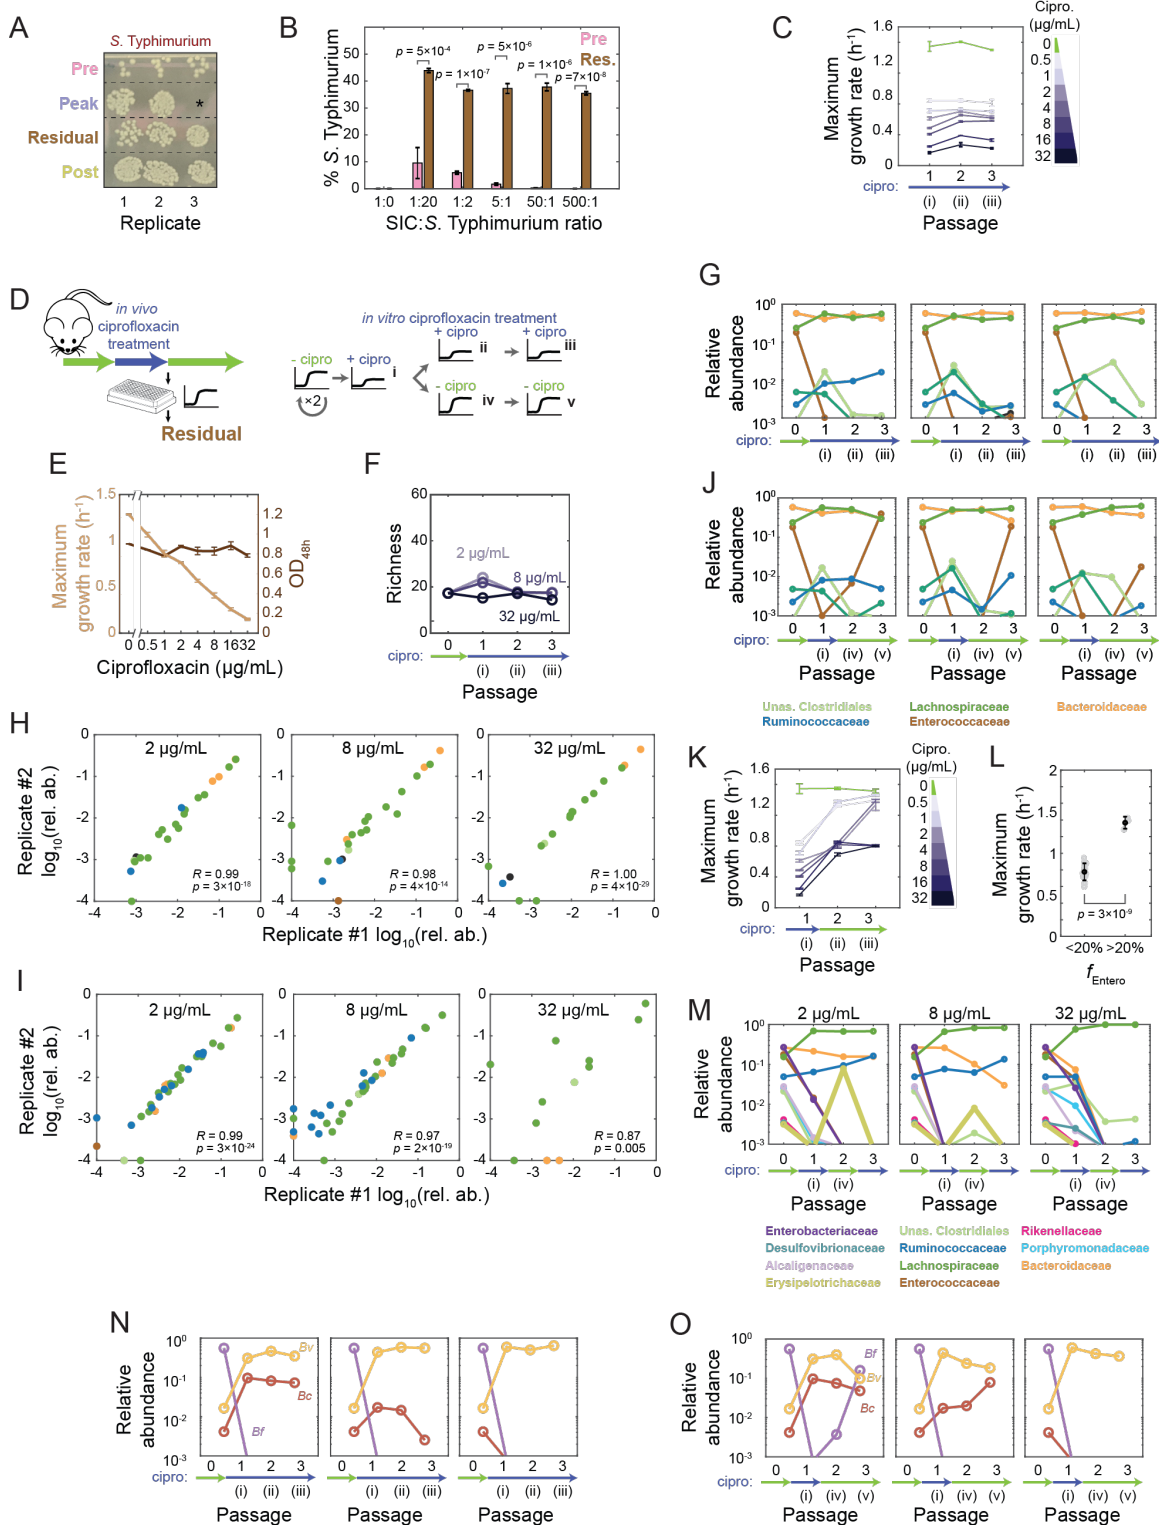

117

118 **Figure S7: Effects and dynamics of antibiotic treatment on SICs, related to Figures 4-**

119 **6.**

120 A,B) *In vivo* ciprofloxacin treatment makes SICs more susceptible to *S. Typhimurium*  
121 invasion. (A) Colonies of *S. Typhimurium* SL1344 after 48 h of growth with SICs  
122 spotted on LB+streptomycin in aerobic conditions after a 1:10<sup>4</sup> dilution. These data  
123 are a biological replicate (SICs derived from mice housed in a different cage) of Fig.  
124 4B. \*: missing replicate. (B) Single-cell quantification of mCherry-tagged *S.*  
125 *Typhimurium* 14028s after 48 h of co-culturing with SICs derived from pre- and  
126 residual-treatment mice fecal inocula. *p*-values are from a Student's two-sided *t*-test  
127 between each pairwise comparison, *n*=3.

128 C) SICs show little adaptation to continuous ciprofloxacin treatment. Maximum growth  
129 rate decreases or remains approximately constant across three passages in  
130 ciprofloxacin.

131 D-J) SICs derived from pre-exposed inocula show increased resilience to ciprofloxacin  
132 treatment. (D) Experimental setup for *in vitro* antibiotic treatment of a pre-exposed  
133 SIC. An SIC passaged in BHI from residual treatment humanized mouse fecal  
134 inoculum (Res-SD) was revived after freezing and passaged twice in BHI. The SIC  
135 was passaged in ciprofloxacin three times (i,ii,iii) or in ciprofloxacin once and then  
136 twice without the drug (i,iv,v). (E) In contrast to the Pre-SD SIC (Fig. 3C), the yield  
137 of Res-SD SIC was virtually unaffected by ciprofloxacin, although the growth rate  
138 decreased with concentration. OD was measured after 48 h of growth with  
139 ciprofloxacin. Lines, means of triplicate growth curves; error bars, standard

140 deviations. (F) Richness (number of ASVs in rarefied data) of Pre-SD SIC remained  
141 constant during continuous ciprofloxacin treatment. Data are means of two technical  
142 replicates. (G) Bacteroidaceae and Lachnospiraceae dominated during three rounds  
143 of ciprofloxacin treatment of the Res-SD SIC. Data are the mean of family-level  
144 abundances across two technical replicates. (H) Treatment of the residual treatment  
145 humanized mouse fecal inoculum (Res-SD) SIC led to highly reproducible outcomes.  
146 Shown are comparisons of relative abundance at the ASV level between replicates  
147 after 3 passages of growth in BHI with ciprofloxacin. Pearson coefficient ( $R$ ) and its  
148  $p$ -value were computed only from data points present in both samples. ASVs with  
149 relative abundance  $<10^{-4}$  were set to  $10^{-4}$  for visualization. (I) Treatment outcome of  
150 Pre-SD SICs was less reproducible than Res-SD SICs at high concentrations. Shown  
151 are comparisons of relative abundance at the ASV level between replicates after 3  
152 passages of growth in BHI with ciprofloxacin. Pearson coefficient ( $R$ ) and its  $p$ -value  
153 were computed only from data points present in both samples. ASVs with relative  
154 abundance  $<10^{-4}$  were set to  $10^{-4}$  for visualization. (J) Enterococcaceae can recover  
155 after one round of ciprofloxacin treatment in the Res-SD SIC. Data are the mean of  
156 two replicates.

157 K-M) SICs derived from pre-exposed inocula show increased resilience to ciprofloxacin  
158 treatment. (K) Pre-SD SIC growth rate can recover to levels similar to values before  
159 treatment at low concentrations. Maximum growth rate was calculated across

160 ciprofloxacin concentrations during one round of antibiotic treatment and two  
161 rounds of recovery. Lines, mean of three technical replicates; error bars, standard  
162 deviations. (L) Growth rate recovery after transient ciprofloxacin treatment is linked  
163 to the recovery of fast-growing species. Maximum growth rate of SICs grown in BHI  
164 after one round of treatment with ciprofloxacin and two rounds without drug. SICs  
165 were classified by their summed relative abundances of Enterococcaceae and  
166 Enterobacteriaceae ( $f_{\text{Enterococcaceae}}$ ). Black circles are the mean maximum growth rate for each  
167 group ( $n=21$  for  $f_{\text{Enterococcaceae}} < 20\%$  and  $n=3$  for  $f_{\text{Enterococcaceae}} > 20\%$ ), error bars are standard  
168 deviations. Individual data points are plotted in gray.  $p$ -value is from a Student's  
169 two-sided  $t$ -test between the two groups. (M) Erysipelotrichaceae recovery is  
170 reversed by a second ciprofloxacin treatment. Data are the family-level mean  
171  $\log_{10}$ (relative abundance) of two replicates during one round of ciprofloxacin  
172 treatment followed by one round of recovery and a second treatment.

173 N,O) Bacteroidaceae are remodeled in the Res-SD SIC during and after ciprofloxacin  
174 treatment, with *B. vulgatus* as the only member to generally survive. Relative  
175 abundances of *Bacteroides* species in the Res-SD SIC during continuous ciprofloxacin  
176 treatment (N) or after one round of treatment followed by two rounds of recovery  
177 (O).
