# Supplementary material
Source: PubMed Central journal article supplement (PMC9082339)

A

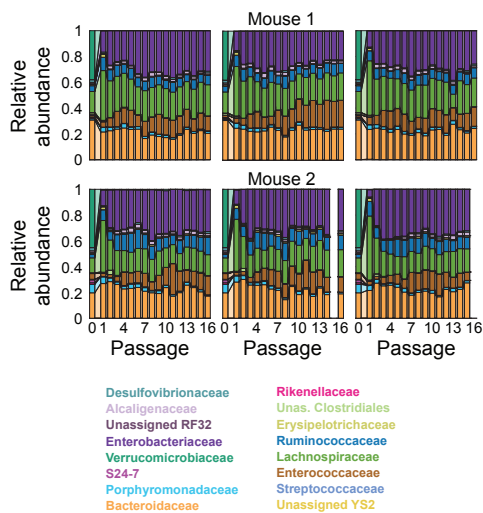

**B**

|           |               |                                        |                              |
|-----------|---------------|----------------------------------------|------------------------------|
| Replicate | 1             | $R$ 0.91<br>share $(8 \times 10^{19})$ | 0.95<br>$(1 \times 10^{20})$ |
|           | 2             | 95.4%<br>(43)                          | 0.90<br>$(5 \times 10^{17})$ |
| 3         | 81.4%<br>(43) | 78.2%<br>(46)                          |                              |
|           | 1             | 2                                      | 3                            |

Replicate

C

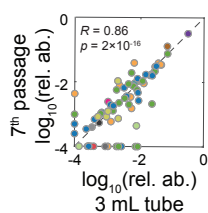

D

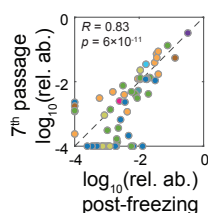

E

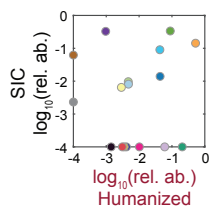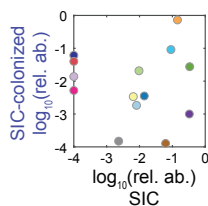

F

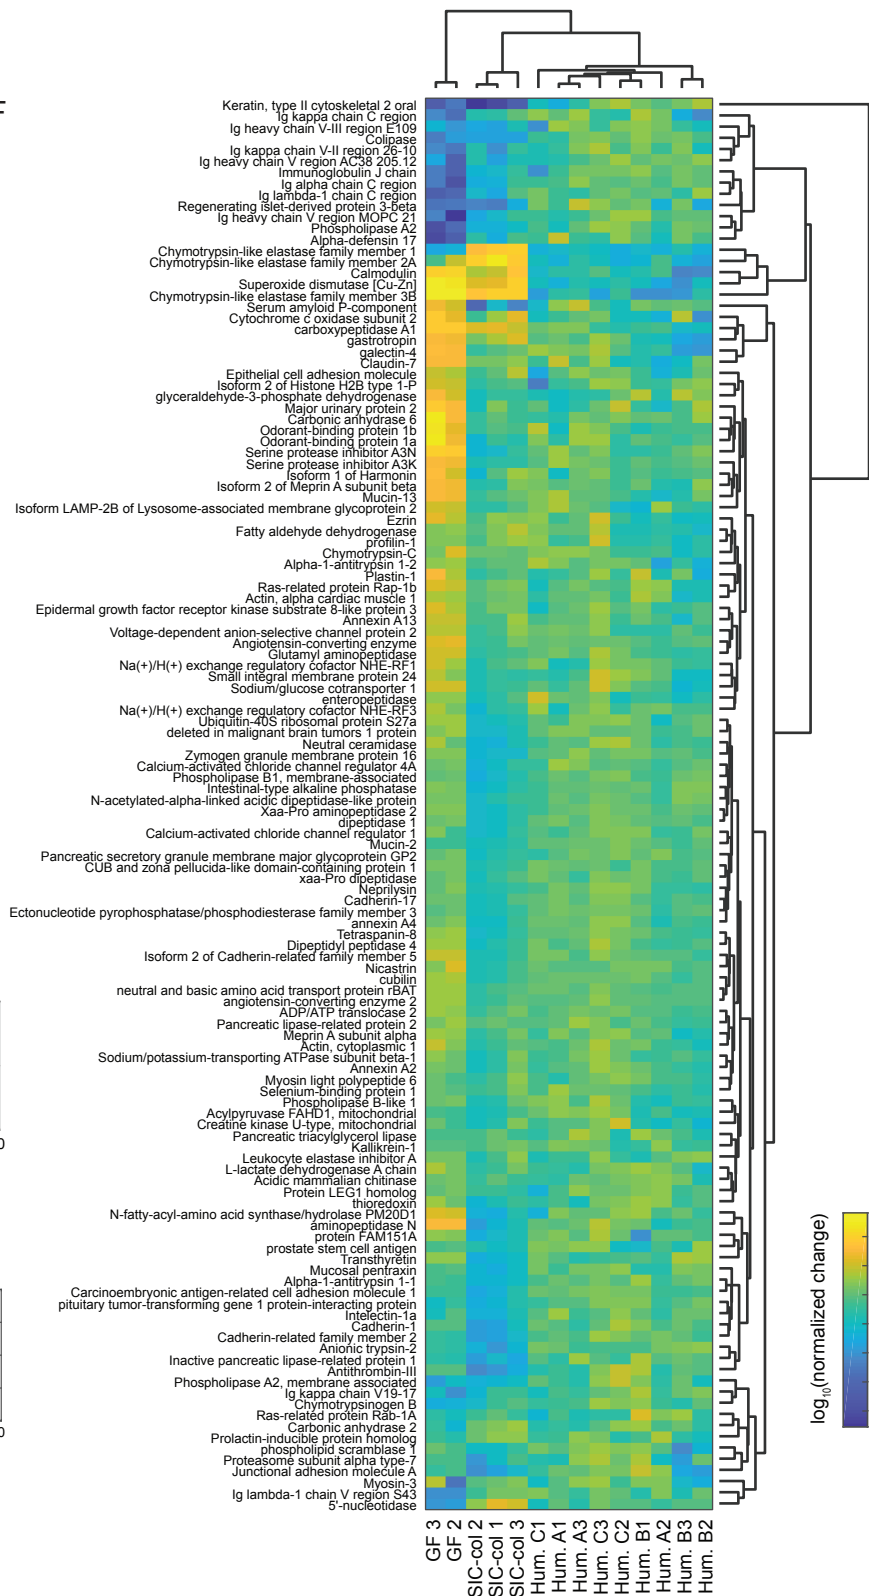

Supplement: NIHMS1803006-supplement-Figure_S1.pdf [file NIHMS1803006-supplement-Figure_S1.pdf]

A

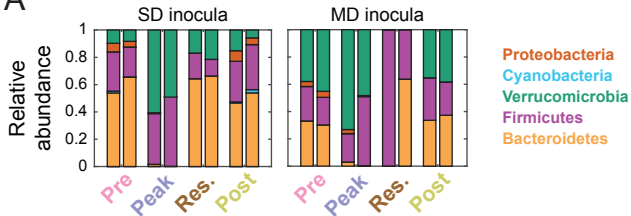

B

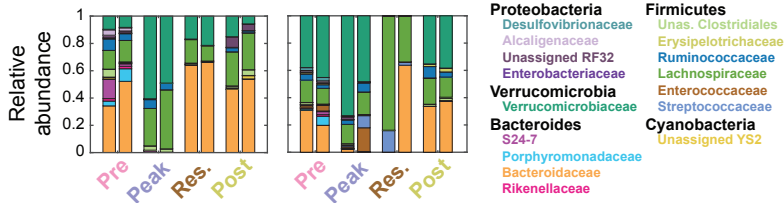

C

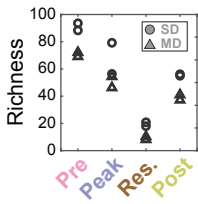

Supplement: NIHMS1803006-supplement-Figure_S2.pdf [file NIHMS1803006-supplement-Figure_S2.pdf]

**A**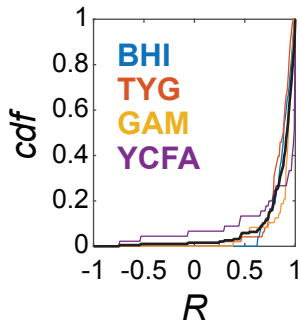**B**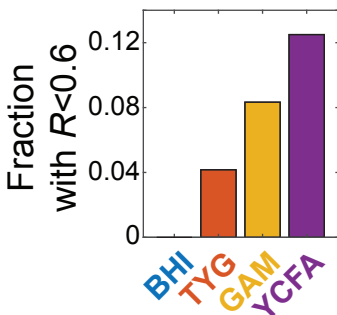**C**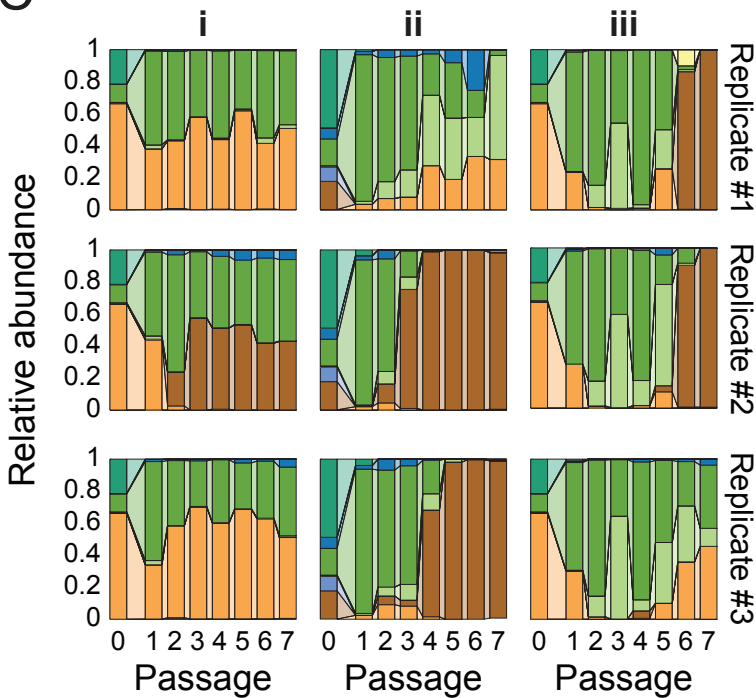

Supplement: NIHMS1803006-supplement-Figure_S3.pdf [file NIHMS1803006-supplement-Figure_S3.pdf]

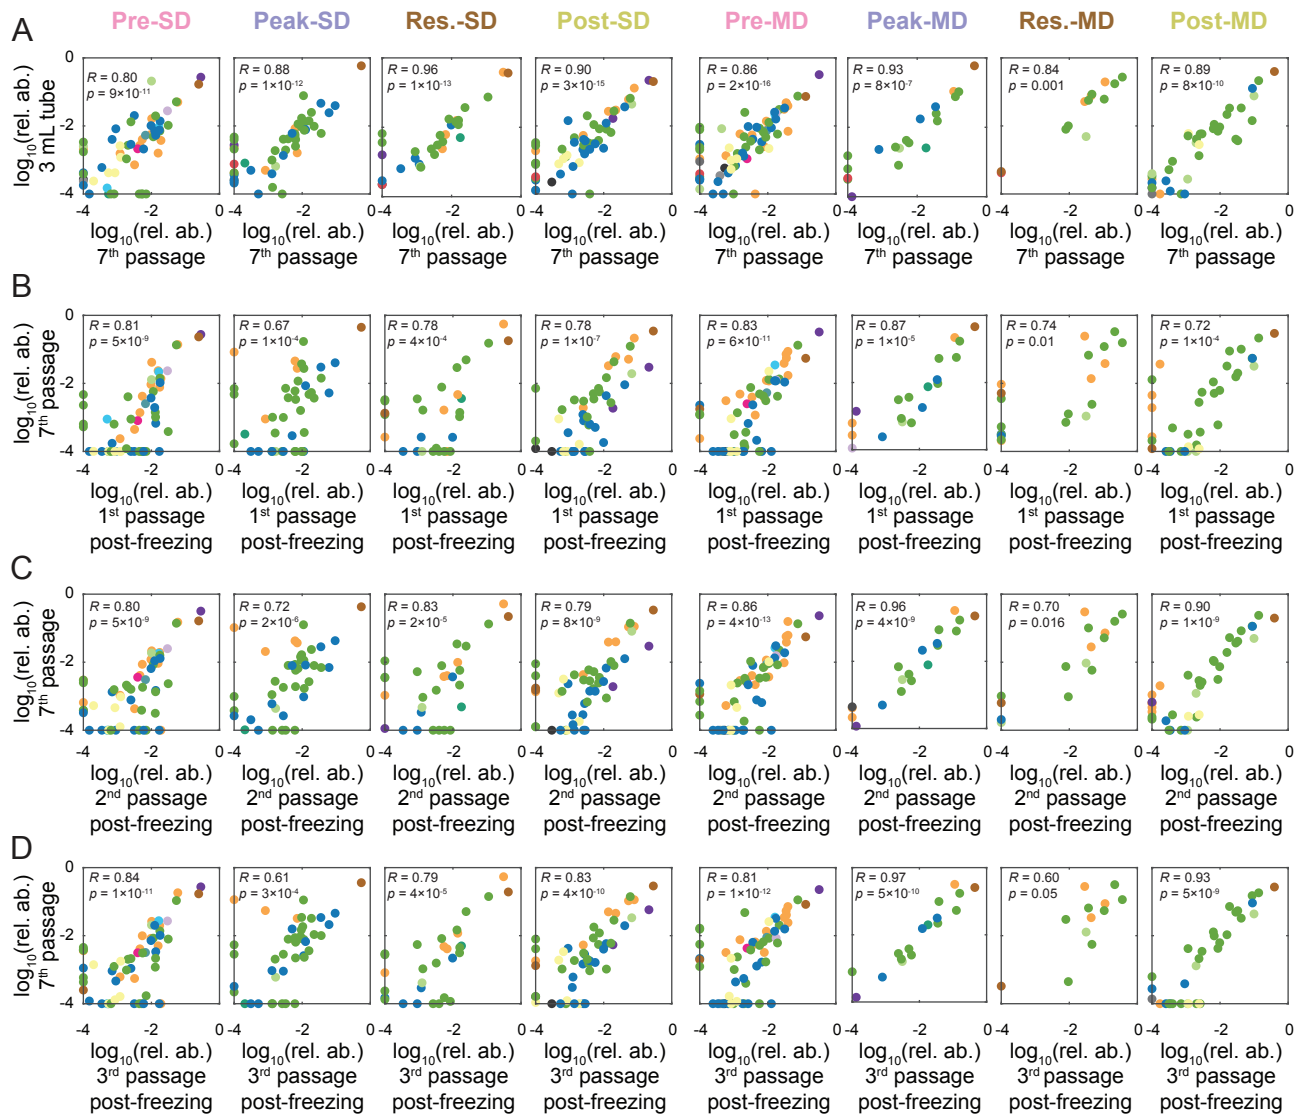

Supplement: NIHMS1803006-supplement-Figure_S4.pdf [file NIHMS1803006-supplement-Figure_S4.pdf]

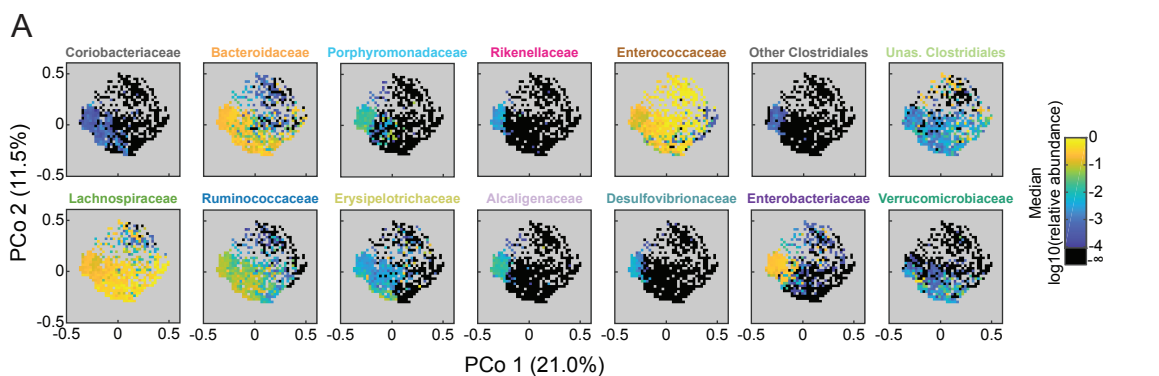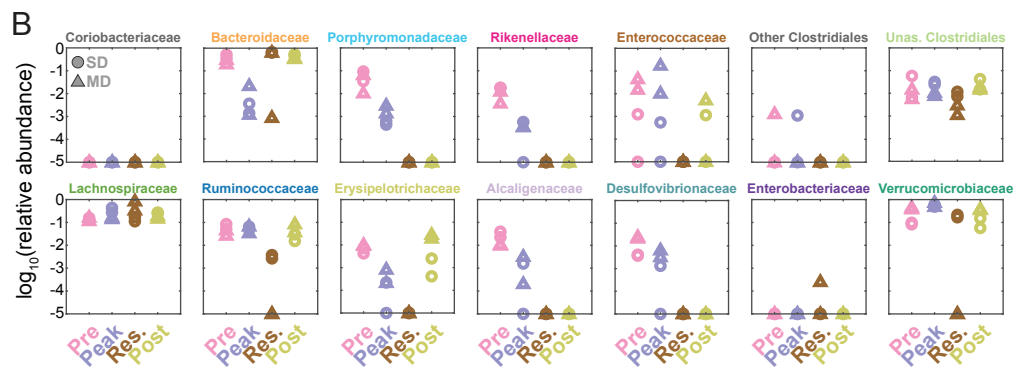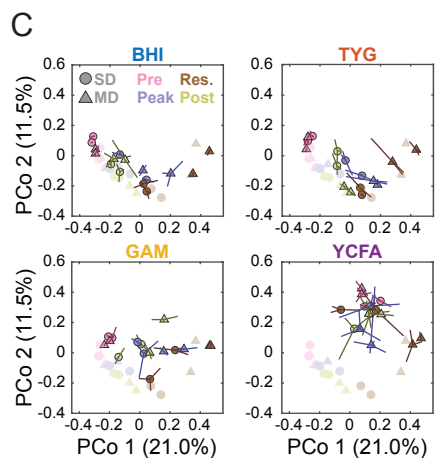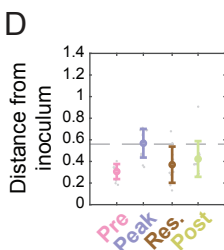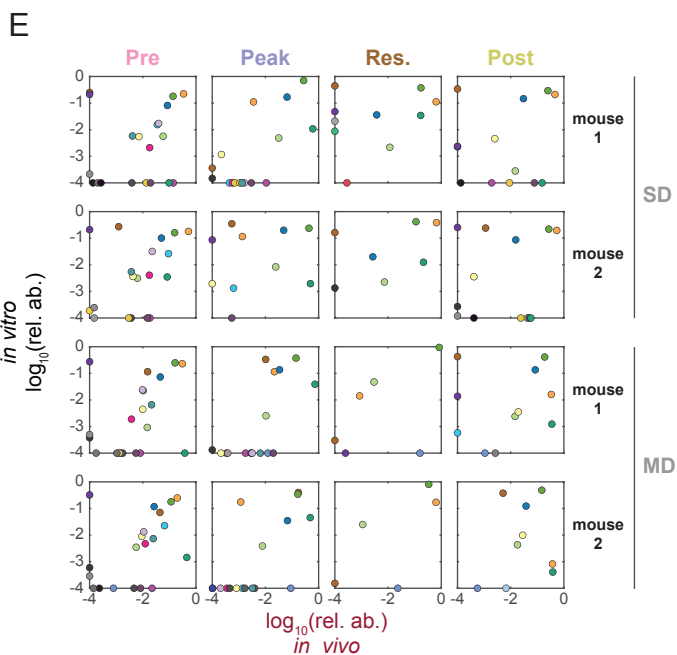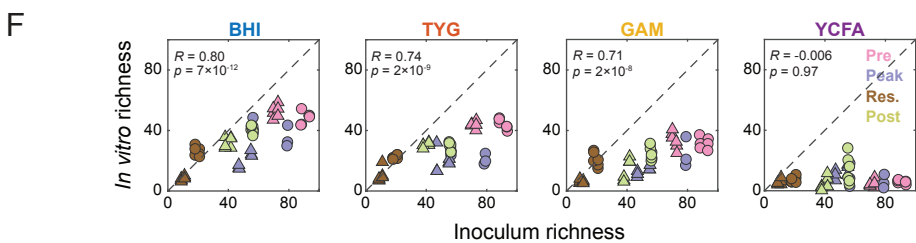

Supplement: NIHMS1803006-supplement-Figure_S5.pdf [file NIHMS1803006-supplement-Figure_S5.pdf]

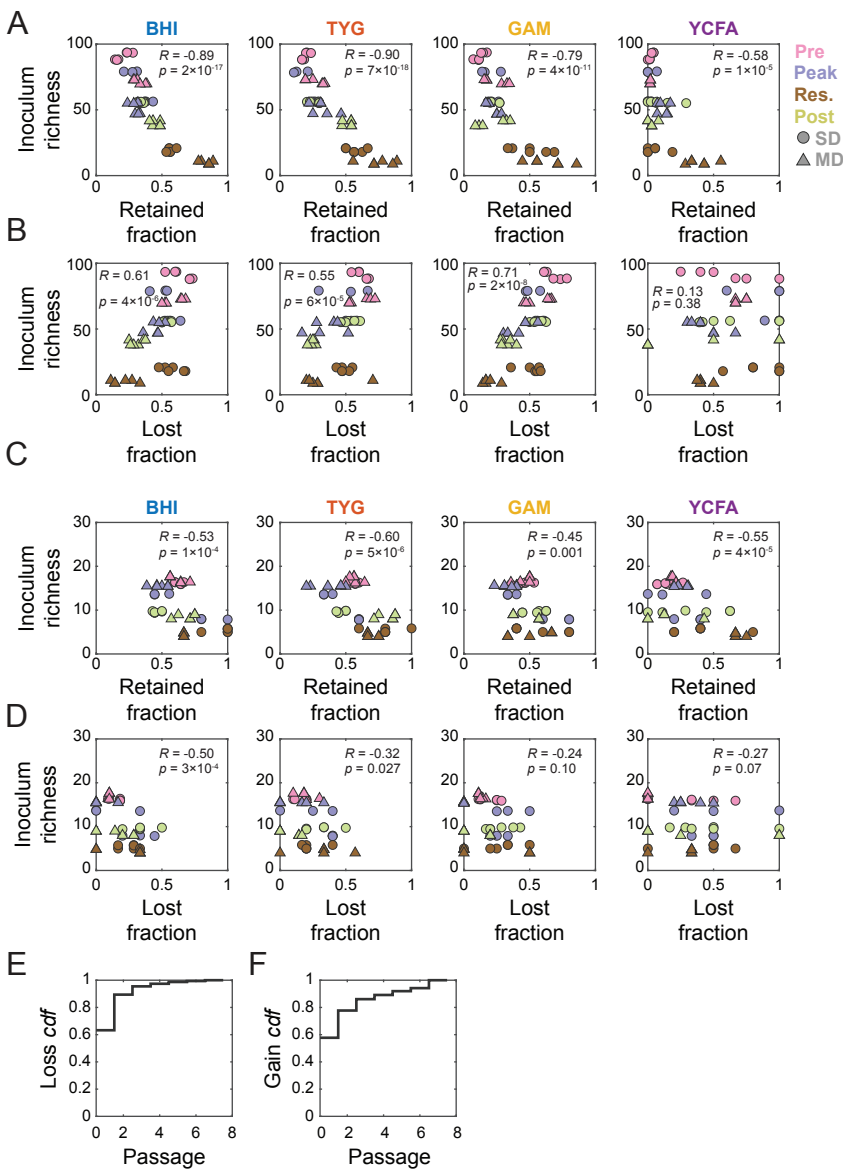

Supplement: NIHMS1803006-supplement-Figure_S6.pdf [file NIHMS1803006-supplement-Figure_S6.pdf]

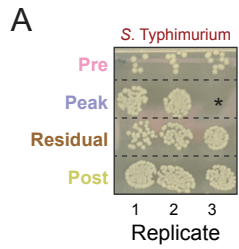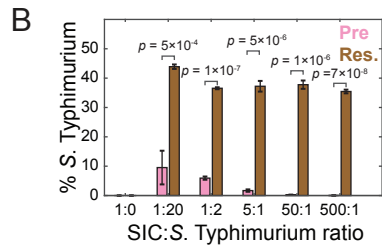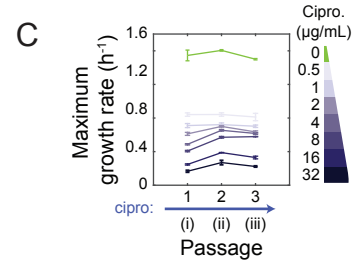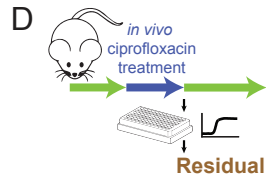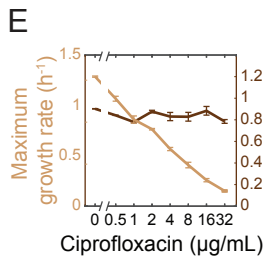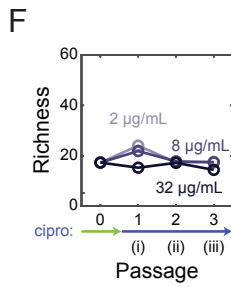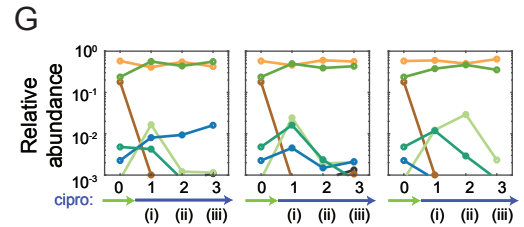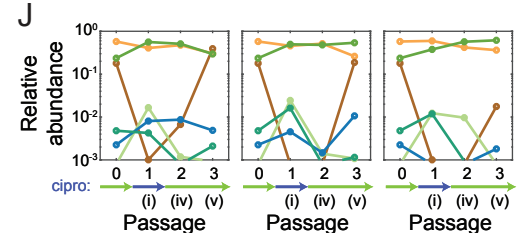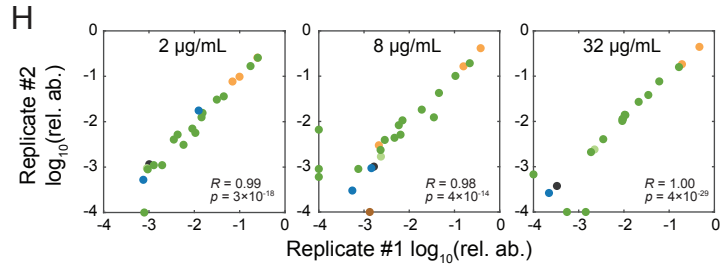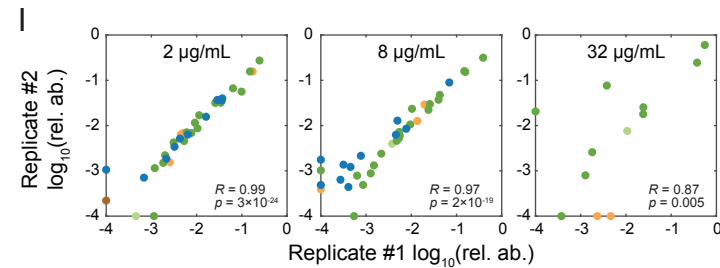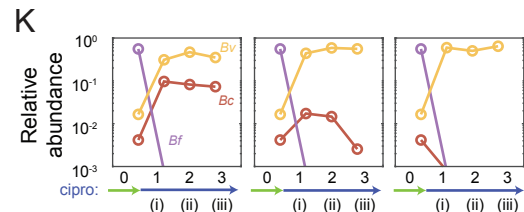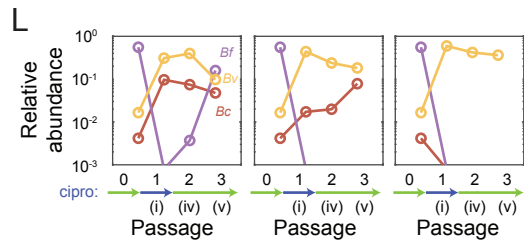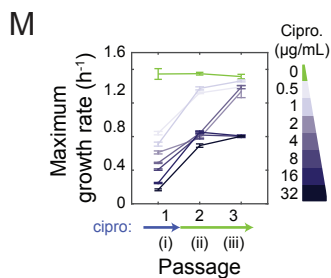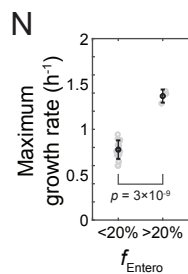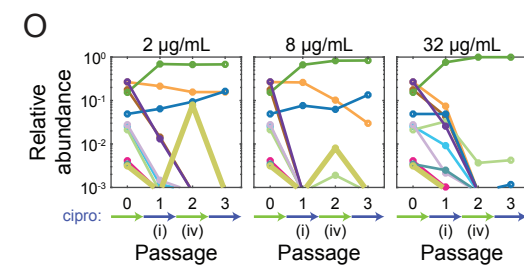

Supplement: NIHMS1803006-supplement-Figure_S7.pdf [file NIHMS1803006-supplement-Figure_S7.pdf]
